# Supplementary material for: A large-scale analysis of racial disparities in police stops across the United States
Source: Springer Nature journal article supplement (doi:10.1038/s41562-020-0858-1), 2020-05-04
Supplement: 41562_2020_858_MOESM1_ESM.pdf [file 41562_2020_858_MOESM1_ESM.pdf]

In the format provided by the authors and unedited.

# A large-scale analysis of racial disparities in police stops across the United States

Emma Pierson<sup>1</sup>, Camelia Simoiu<sup>2</sup>, Jan Overgoor<sup>2</sup>, Sam Corbett-Davies<sup>1</sup>, Daniel Jenson<sup>2</sup>, Amy Shoemaker <sup>2</sup>, Vignesh Ramachandran<sup>2</sup>, Phoebe Barghouty<sup>2</sup>, Cheryl Phillips<sup>3</sup>, Ravi Shroff<sup>4</sup> and Sharad Goel <sup>2</sup> 

---

<sup>1</sup>Computer Science, Stanford University, Stanford, CA, USA. <sup>2</sup>Management Science & Engineering, Stanford University, Stanford, CA, USA.

<sup>3</sup>Communication, Stanford University, Stanford, CA, USA. <sup>4</sup>Applied Statistics, Social Science, and Humanities, New York University, New York, NY, USA.

e-mail: [scgoel@stanford.edu](mailto:scgoel@stanford.edu)

# Supplementary Information

## Supplementary Figures

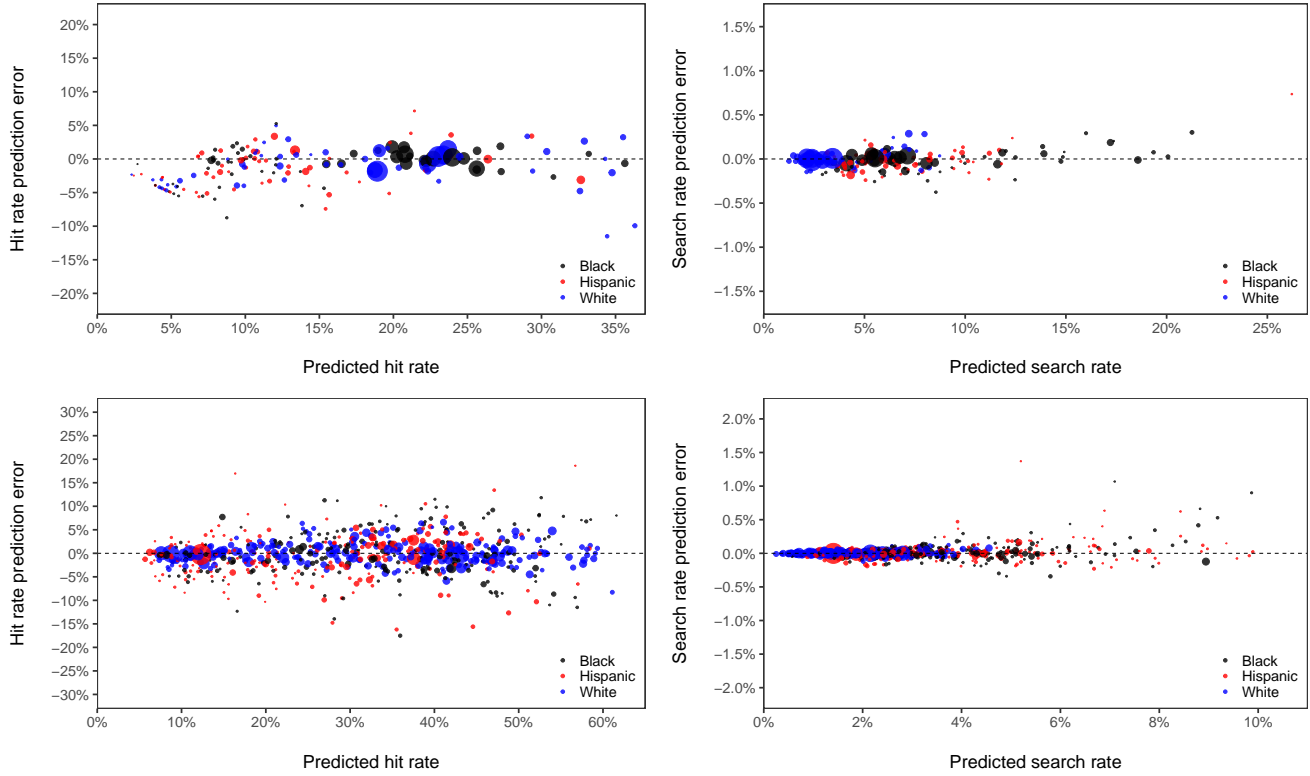

**Supplementary Figure 1.** Posterior predictive checks for threshold test models for municipal police department (top) and state patrol (bottom) data. Prediction errors for both hit rates (left) and search rates (right) are minimal and consistent across race groups, validating the models' fit. In the left column, point size corresponds to number of searches per location (per county, above, and per district, below); in the right column, point size corresponds to the number of stops per location (per county, above, and per district, below).

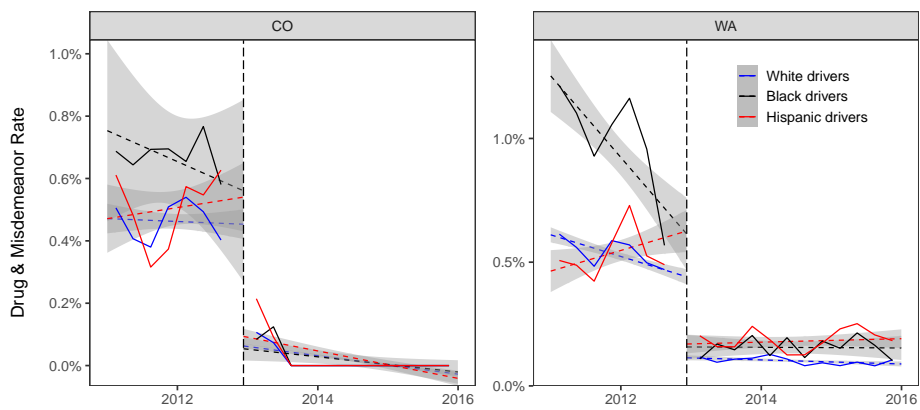

**Supplementary Figure 2.** The proportion of stops that result in a drug-related infraction or misdemeanor before and after recreational marijuana was legalized in Colorado and Washington at the end of 2012 (indicated by the vertical lines). Subsequent to legalization, there is a substantial drop in offense rates. Data from the fourth quarter of 2012 are excluded, since that period includes stops both before and after legalization. The rates in CO (left panel) are based on 1,534,893 stops; the rates in WA (right panel) are based on 3,985,677 stops. In Colorado, we consider only offenses for marijuana possession; in Washington, we include all drug-related misdemeanors, as more detailed information is not available, so there are still some recorded drug violations post-legalization.

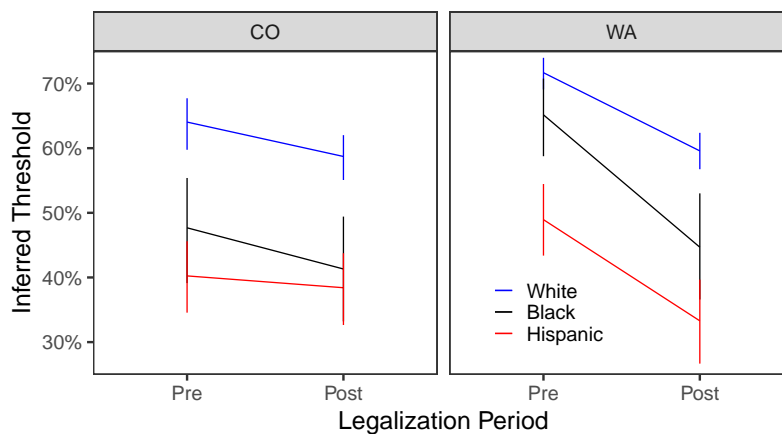

**Supplementary Figure 3.** Inferred thresholds faced by white (blue lines), black (black lines), and Hispanic (red lines) drivers before and after marijuana legalization. Error bars show the 95% credible intervals. The threshold values in CO (left panel) are inferred from 1,674,619 stops; the threshold values in WA (right panel) are inferred from 3,985,677 stops. In all cases black and Hispanic drivers face a lower threshold than white drivers.

## Supplementary Tables

**Supplementary Table 1.** Coefficient estimates for different veil-of-darkness model specifications, varying the inclusion of separate state/city intercepts, the inclusion of an interaction term between time and location, and the degrees of freedom in the natural spline over time. All models are based on stops conducted during the two 60-day windows centered on the beginning and end of daylight savings time. The “coef.” column estimates differences in the racial composition of stopped drivers before sunset and after dark, after adjusting for time and location. The results presented in the main text are in bold, and correspond to a model which includes state and city intercepts, has no interaction term between time and location, and has six degrees of freedom in the natural spline over time. All coefficient estimates are negative and statistically significant (all p-values are two-tailed), suggesting that evidence of racial bias against black drivers is robust to different model specifications.

|                              | spline d.f. |              | coef.         | s.e.         | 95% CI                  | p value          |
|------------------------------|-------------|--------------|---------------|--------------|-------------------------|------------------|
|                              | 1           |              | -0.040        | 0.002        | (-0.045, -0.035)        | <0.001           |
| Models with                  | 2           |              | -0.035        | 0.003        | (-0.040, -0.030)        | <0.001           |
| no state/city intercept      | 3           |              | -0.034        | 0.003        | (-0.039, -0.029)        | <0.001           |
| and no interaction term      | 4           |              | -0.036        | 0.003        | (-0.041, -0.031)        | <0.001           |
| between time and location    | 5           |              | -0.036        | 0.003        | (-0.041, -0.031)        | <0.001           |
|                              | 6           |              | -0.036        | 0.003        | (-0.041, -0.031)        | <0.001           |
|                              | 1           |              | -0.032        | 0.003        | (-0.037, -0.028)        | <0.001           |
| Models with                  | 2           |              | -0.039        | 0.003        | (-0.044, -0.034)        | <0.001           |
| no state/city intercept      | 3           |              | -0.041        | 0.003        | (-0.046, -0.035)        | <0.001           |
| and with an interaction term | 4           |              | -0.041        | 0.003        | (-0.046, -0.036)        | <0.001           |
| between time and location    | 5           |              | -0.041        | 0.003        | (-0.046, -0.036)        | <0.001           |
|                              | 6           |              | -0.041        | 0.003        | (-0.046, -0.035)        | <0.001           |
|                              | 1           | city         | -0.044        | 0.003        | (-0.049, -0.038)        | <0.001           |
|                              | 1           | state        | -0.036        | 0.003        | (-0.041, -0.030)        | <0.001           |
|                              | 2           | city         | -0.038        | 0.003        | (-0.044, -0.032)        | <0.001           |
|                              | 2           | state        | -0.032        | 0.003        | (-0.038, -0.026)        | <0.001           |
| Models with                  | 3           | city         | -0.037        | 0.003        | (-0.043, -0.031)        | <0.001           |
| state/city intercept and     | 3           | state        | -0.032        | 0.003        | (-0.038, -0.027)        | <0.001           |
| no interaction term          | 4           | city         | -0.039        | 0.003        | (-0.045, -0.033)        | <0.001           |
| between time and location    | 4           | state        | -0.033        | 0.003        | (-0.039, -0.027)        | <0.001           |
|                              | 5           | city         | -0.039        | 0.003        | (-0.045, -0.033)        | <0.001           |
|                              | 5           | state        | -0.033        | 0.003        | (-0.039, -0.027)        | <0.001           |
|                              | <b>6</b>    | <b>city</b>  | <b>-0.039</b> | <b>0.003</b> | <b>(-0.045, -0.033)</b> | <b>&lt;0.001</b> |
|                              | <b>6</b>    | <b>state</b> | <b>-0.033</b> | <b>0.003</b> | <b>(-0.039, -0.027)</b> | <b>&lt;0.001</b> |
|                              | 1           | city         | -0.021        | 0.003        | (-0.028, -0.015)        | <0.001           |
|                              | 1           | state        | -0.043        | 0.003        | (-0.050, -0.037)        | <0.001           |
|                              | 2           | city         | -0.030        | 0.004        | (-0.037, -0.023)        | <0.001           |
|                              | 2           | state        | -0.049        | 0.004        | (-0.056, -0.042)        | <0.001           |
| Models with                  | 3           | city         | -0.033        | 0.004        | (-0.040, -0.026)        | <0.001           |
| state/city intercept and     | 3           | state        | -0.049        | 0.004        | (-0.057, -0.042)        | <0.001           |
| with an interaction term     | 4           | city         | -0.033        | 0.004        | (-0.040, -0.026)        | <0.001           |
| between time and location    | 4           | state        | -0.050        | 0.004        | (-0.057, -0.042)        | <0.001           |
|                              | 5           | city         | -0.033        | 0.004        | (-0.040, -0.026)        | <0.001           |
|                              | 5           | state        | -0.049        | 0.004        | (-0.057, -0.042)        | <0.001           |
|                              | 6           | city         | -0.033        | 0.004        | (-0.040, -0.026)        | <0.001           |
|                              | 6           | state        | -0.049        | 0.004        | (-0.057, -0.042)        | <0.001           |

**Supplementary Table 2. Summary of the data for the 35 municipal police departments (top) and 21 state patrol agencies (bottom) used in our analyses. A solid circle ● signifies that data are available for at least 50% of stops. An × signifies that while data are available, they appeared untrustworthy and thus were not used. Geographic subdivision typically means county (for state patrol agencies) or beat/precinct (for municipal police departments). A star \* in the geographic subdivision column indicates that a subdivision other than county was available (department id or zone), but county information was not present.**

|              | State | City          | Stops             | Date Range | Date | Time | Geographic Subdivision | Subject Race | Subject Age | Subject Gender | Search Conducted | Contraband Found |
|--------------|-------|---------------|-------------------|------------|------|------|------------------------|--------------|-------------|----------------|------------------|------------------|
| 1            | AR    | Little Rock   | 13,072            | 2017-2017  | ●    | ●    | ●                      | ●            | ●           | ●              |                  |                  |
| 2            | CA    | Bakersfield   | 140,544           | 2011-2018  | ●    | ●    | ●                      | ●            | ●           | ●              |                  |                  |
| 3            | CA    | Los Angeles   | 3,328,632         | 2011-2018  | ●    | ●    | ●                      | ●            | ●           | ●              |                  |                  |
| 4            | CA    | Oakland       | 95,441            | 2013-2017  | ●    | ●    | ●                      | ●            | ●           | ●              | ●                | ●                |
| 5            | CA    | San Diego     | 312,175           | 2014-2017  | ●    | ●    | ●                      | ●            | ●           | ●              | ●                | ●                |
| 6            | CA    | San Francisco | 326,717           | 2011-2016  | ●    | ●    | ●                      | ●            | ●           | ●              | ●                | ●                |
| 7            | CA    | San Jose      | 75,577            | 2013-2018  | ●    | ●    | ●                      | ●            | ●           | ●              | ●                | ●                |
| 8            | CO    | Aurora        | 160,080           | 2012-2016  | ●    | ●    | ●                      | ●            | ●           | ●              |                  |                  |
| 9            | CT    | Hartford      | 18,219            | 2013-2016  | ●    | ●    | ●                      | ●            | ●           | ●              | ●                | ●                |
| 10           | KS    | Wichita       | 352,287           | 2011-2016  | ●    | ●    | ●                      | ●            | ●           | ●              |                  |                  |
| 11           | KY    | Louisville    | 105,055           | 2015-2018  | ●    | ●    | ●                      | ●            | ●           | ●              | ●                | ●                |
| 12           | LA    | New Orleans   | 259,353           | 2011-2018  | ●    | ●    | ●                      | ●            | ●           | ●              | ●                | ●                |
| 13           | MN    | Saint Paul    | 127,214           | 2011-2016  | ●    | ●    | ●                      | ●            | ●           | ●              | ●                | ●                |
| 14           | NC    | Charlotte     | 604,544           | 2011-2015  | ●    | ●    | ●                      | ●            | ●           | ●              | ●                | ●                |
| 15           | NC    | Durham        | 133,242           | 2011-2015  | ●    | ●    | ●                      | ●            | ●           | ●              | ●                | ●                |
| 16           | NC    | Fayetteville  | 215,552           | 2011-2015  | ●    | ●    | ●                      | ●            | ●           | ●              | ●                | ●                |
| 17           | NC    | Greensboro    | 206,492           | 2011-2015  | ●    | ●    | ●                      | ●            | ●           | ●              | ●                | ●                |
| 18           | NC    | Raleigh       | 326,840           | 2011-2015  | ●    | ●    | ●                      | ●            | ●           | ●              | ●                | ●                |
| 19           | NC    | Winston-Salem | 174,775           | 2011-2015  | ●    | ●    | ●                      | ●            | ●           | ●              | ●                | ●                |
| 20           | NJ    | Camden        | 138,142           | 2013-2018  | ●    | ●    | ●                      | ●            | ●           | ●              |                  |                  |
| 21           | NV    | Henderson     | 101,962           | 2011-2018  | ●    | ●    | ●                      | ●            | ●           | ●              |                  |                  |
| 22           | NY    | Albany        | 21,805            | 2011-2015  | ●    | ●    | ●                      | ●            | ●           | ●              |                  |                  |
| 23           | OH    | Cincinnati    | 200,742           | 2011-2018  | ●    | ●    | ●                      | ●            | ●           | ●              |                  |                  |
| 24           | OH    | Columbus      | 121,043           | 2012-2016  | ●    | ●    | ●                      | ●            | ●           | ●              | ●                | ●                |
| 25           | OK    | Oklahoma City | 531,313           | 2011-2017  | ●    | ●    | ●                      | ●            | ●           | ●              |                  |                  |
| 26           | OK    | Tulsa         | 198,576           | 2011-2016  | ●    | ●    | ●                      | ●            | ●           | ●              |                  |                  |
| 27           | PA    | Philadelphia  | 1,114,213         | 2014-2018  | ●    | ●    | ●                      | ●            | ●           | ●              | ●                | ●                |
| 28           | PA    | Pittsburgh    | 169,964           | 2011-2018  | ●    | ●    | ●                      | ●            | ●           | ●              | ●                | ●                |
| 29           | TN    | Nashville     | 2,362,727         | 2011-2018  | ●    | ●    | ●                      | ●            | ●           | ●              | ●                | ●                |
| 30           | TX    | Arlington     | 102,901           | 2016-2016  | ●    | ●    | ●                      | ●            | ●           | ●              | ●                | ●                |
| 31           | TX    | Garland       | 148,009           | 2012-2018  | ●    | ●    | ●                      | ●            | ●           | ●              |                  |                  |
| 32           | TX    | Plano         | 101,542           | 2013-2015  | ●    | ●    | ●                      | ●            | ●           | ●              | ●                | ●                |
| 33           | TX    | San Antonio   | 845,733           | 2012-2018  | ●    | ●    | ●                      | ●            | ●           | ●              | ●                | ●                |
| 34           | VT    | Burlington    | 28,718            | 2012-2017  | ●    | ●    | ●                      | ●            | ●           | ●              | ●                | ●                |
| 35           | WI    | Madison       | 195,595           | 2011-2017  | ●    | ●    | ●                      | ●            | ●           | ●              |                  |                  |
| <hr/>        |       |               |                   |            |      |      |                        |              |             |                |                  |                  |
| 1            | AZ    | –             | 3,202,567         | 2011-2017  | ●    | ●    | ●                      | ●            | ●           | ●              | ●                | ×                |
| 2            | CA    | –             | 20,642,287        | 2011-2016  | ●    | ●    | ●                      | ●            | ●           | ●              | ●                | ●                |
| 3            | CO    | –             | 2,232,609         | 2011-2017  | ●    | ●    | ●                      | ●            | ●           | ●              | ●                | ●                |
| 4            | CT    | –             | 432,122           | 2013-2015  | ●    | ●    | ●                      | ●            | ●           | ●              | ●                | ●                |
| 5            | FL    | –             | 6,348,386         | 2011-2018  | ●    | ●    | ●                      | ●            | ●           | ●              | ●                | ●                |
| 6            | GA    | –             | 927,071           | 2012-2016  | ●    | ●    | ●                      | ●            | ●           | ●              |                  |                  |
| 7            | IL    | –             | 1,813,162         | 2012-2017  | ●    | ●    | *                      | ●            | ●           | ●              | ●                | ●                |
| 8            | MA    | –             | 1,773,546         | 2011-2015  | ●    | ●    | ●                      | ●            | ●           | ●              | ●                | ×                |
| 9            | MT    | –             | 642,200           | 2011-2016  | ●    | ●    | ●                      | ●            | ●           | ●              | ●                | ●                |
| 10           | NC    | –             | 3,500,180         | 2011-2015  | ●    | ●    | ●                      | ●            | ●           | ●              | ●                | ●                |
| 11           | ND    | –             | 250,525           | 2011-2015  | ●    | ●    | ●                      | ●            | ●           | ●              |                  |                  |
| 12           | NH    | –             | 160,794           | 2014-2015  | ●    | ●    | ●                      | ●            | ●           | ●              |                  |                  |
| 13           | NY    | –             | 6,318,577         | 2011-2017  | ●    | ●    | ●                      | ●            | ●           | ●              |                  |                  |
| 14           | OH    | –             | 5,630,180         | 2011-2017  | ●    | ●    | ●                      | ●            | ●           | ●              | ●                | ●                |
| 15           | RI    | –             | 229,691           | 2011-2015  | ●    | ●    | *                      | ●            | ●           | ●              | ●                | ●                |
| 16           | SC    | –             | 4,288,166         | 2011-2016  | ●    | ●    | ●                      | ●            | ●           | ●              | ●                | ●                |
| 17           | TN    | –             | 1,953,299         | 2011-2016  | ●    | ●    | ●                      | ●            | ●           | ●              |                  |                  |
| 18           | TX    | –             | 14,210,473        | 2011-2017  | ●    | ●    | ●                      | ●            | ●           | ●              | ●                | ●                |
| 19           | VT    | –             | 250,949           | 2011-2015  | ●    | ●    | *                      | ●            | ●           | ●              | ●                | ●                |
| 20           | WA    | –             | 5,858,474         | 2011-2018  | ●    | ●    | ●                      | ●            | ●           | ●              | ●                | ●                |
| 21           | WI    | –             | 754,451           | 2011-2016  | ●    | ●    | ●                      | ●            | ●           | ●              | ●                | ●                |
| <b>Total</b> |       |               | <b>94,778,505</b> |            |      |      |                        |              |             |                |                  |                  |
